# Supplementary material for: Engineered M2a macrophages for the treatment of osteoarthritis
Source: Front Immunol. 2022 Dec 13;13:1054938. doi: 10.3389/fimmu.2022.1054938 (PMC9792488; doi:10.3389/fimmu.2022.1054938)
Supplement: Supplementary Table 1 — The source and identifier of reagents used in this study. [file Table_1.xlsx]

## Sheet: Sheet4
REAGENTS	SOURCE	IDENTIFIER
RPMI1640	Gibco, California, USA	C11875500
fetal bovine serum	Gibco, California, USA	10270-106
penicillin and streptomycin	Proteintech, Wuhan, China	PR40022
Recombbinant M-CSF	Proteintech, Wuhan, China	092185
Recombbinant IL-4	Proteintech, Wuhan, China	051914
Recombbinant IL-13	Proteintech, Wuhan, China	061823
Recombbinant IFN-γ	Proteintech, Wuhan, China	091927
Lipopolysaccharide (LPS)	Sigma, Ohio, USA	L-2880
Genomic DNA extraction kit	Invitrogen, California, USA	K182001
CD86 antibody	Proteintech, Wuhan, China	13395-1-AP
CD206 antibody	Proteintech, Wuhan, China	60143-1-AP
Alexa Fluor 488 anti-Rabbit IgG antibody	ZenBio, Chengdu, China	550037
Alexa Fluor 405 anti-Mouse IgG antibody	Bioss, Beijing, China	bs-0296G-AF405
Transwell plate	Corning, USA	-
SA-β-gal staining kit	Beyotime, Shanghai, China	C0602
Annexin V-FITC/propidium iodide (PI) double staining kit	Biosciences, UK	CC2210
CM-Dil staining kit	Invitrogen, California, USA	C7000
Safranin O/fast green staining kit	Solarbio, Beijing, China	G1371
JYBL I decalcifying fluid	G-CLONE, Beijing, China	RS4121
0.5M EDTA decalcifying fluid	Servicebio, Wuhan, China	G1105
4% Paraformaldehyde	Biosharp, Hefei, China	BL539A
MMP13 antibody	Signalway, USA	41154
IL-6 antibody	Signalway, USA	53904
Col I antibody	Bioss, Beijing, China	bs-0578R
STAT6 antibody	Proteintech, Wuhan, China	66717-1-lg
p-STAT6 antibody	Immunoway, USA	YP0256
iNOS antibody	Bioss, Beijing, China	bs-0162R
TNFR1 antibody	Proteintech, Wuhan, China	21574-1-AP
TNFα antibody	ZenBio, Chengdu, China	346654
IL-4 antibody	Bioss, Beijing, China	bs-0581R
N-cadherin antibody	Proteintech, Wuhan, China	66219-1-lg
CD4 antibody	Bioss, Beijing, China	bs-0647R
GAPDH antibody	Proteintech, Wuhan, China	10494-1-AP
Col II antibody	Servicebio, Wuhan, China	GB11021
Col X antibody	Affinity, China	DF13214
ACAN antibody	Proteintech, Wuhan, China	13880-1-AP
HRP-conjugated Affinipure Rabbit Anti-Mouse IgG(H+L) antibody	Proteintech, Wuhan, China	SA00001-1
HRP-conjugated Affinipure Rabbit Anti-Goat IgG(H+L) antibody	Proteintech, Wuhan, China	SA00001-2
Electrochemiluminescence (ECL) western blot reagents	Biosharp, Hefei, China	BL520A
TRIzol reagent	Life Technologies, USA	190906
HiScript II Q RT SuperMix	Vazyme, Nanjing, China	R223-01
ChamQ Universal SYBR qPCR Master Mix	Vazyme, Nanjing, China	Q711-02
