# Supplementary material for: Engineered M2a macrophages for the treatment of osteoarthritis
Source: Front Immunol. 2022 Dec 13;13:1054938. doi: 10.3389/fimmu.2022.1054938 (PMC9792488; doi:10.3389/fimmu.2022.1054938)
Supplement: Supplementary Table 2 — The rat primer sequence for RT-PCR. [file Table_2.xlsx]

## Sheet: Sheet1
Rat Primers For RT-qPCR
Gene Name	Sequence		Cells	Figure
β-actin	Forward	CCCGCGAGTACAACCTTCTT	Macrophage, FLS, Chondrocyte	1, 2, 3, 4
	Reverse	CGCAGCGATATCGTCATCCA
Cdh1 (E-cadherin)	Forward	ATCCTGGCCCTCCTGATTCT	FLS	3
	Reverse	CGGGTATCGTCATCTGGTGG
Nfkb1	Forward	GTCAAAATTTGCAACTATGTGGGG	Macrophage	1,S3
	Reverse	GCGTGCAGGTGGATGTTTTT
Tnfa	Forward	ATGGCCTCCCTCTCATCAGT	Macrophage, FLS	1,2,3,S3
	Reverse	TTTGCTACGACGTGGGCTAC
Il-4	Forward	CTCGAATGTACCAGGAGCCA	Macrophage	2
	Reverse	AGGACGTTTGGCACATCCAT
Il-6	Forward	AGTCCTTCCTACCCCAATTTCC	Macrophage, FLS	1,2,3,S2
	Reverse	TGGTCTTGGTCCTTAGCCAC
Cd86	Forward	CTTACGGAAGCACCCACGAT	Macrophage	1,2,S2
	Reverse	TGTAAATGGGCACGGCAGAT
Cd206	Forward	ATGGATTGCCCTGAACAGCA	Macrophage	1,2,S2
	Reverse	CTCGTCAGCACCCCAGTTAG
Il-10	Forward	GGTGAGAAGCTGAAGACCCTC	Macrophage	1,2,3,S2,S3
	Reverse	GCCTTGTAGACACCTTGGTCTT
Tgfb1	Forward	ACTGGAGTTGTACGGCAGTG	Macrophage	1,2,S2,S3
	Reverse	GGGCTGATCCCGTTGATTTC
Tnfr1	Forward	GCTGTTGCCCCTGGTTATCT	Macrophage	2
	Reverse	ATGGAGTAGACTTCGGGCCT
Arg1	Forward	ACATTGGCTTGCGAGACGTA	Macrophage	1
	Reverse	ATCACCTTGCCAATCCCCAG
Il-1b	Forward	GCACAGTTCCCCAACTGGTA	Macrophage, FLS	1,2,3,S2,S3
	Reverse	ACACGGGTTCCATGGTGAAG
Vegf	Forward	ACTCATCAGCCAGGGAGTCT	Macrophage	1
	Reverse	GGGAGTGAAGGAGCAACCTC
Mmp1	Forward	AGGAAACCTAGGTGTGGGGT	FLS	3
	Reverse	GGCTCTCTCGATGGCGTTTT
Acan	Forward	GGGACCTGTGTGAGATCGAC	Chondrocyte	4
	Reverse	GGTCGGGAAAGTGGCGATAA
p16ink4a	Forward	GTAGTACTGCACCAGGCAGG	Chondrocyte	4
	Reverse	CCCAGCGGAGGAGAGTAGAT
p21cip1	Forward	TGTGATATGTACCAGCCACAGG	Chondrocyte	4
	Reverse	CGAACAGACGACGGCATACT
Primers For DNA cleavage assay
Gene Name	Sequence
Tnfr1	Forward	AAGTGCCACAAAGGAACCTACT
	Reverse	CATGCTGTAATGAGCCTCGC
sgRNA sequence
Gene Name	Sequence
Tnfr1	cccgtcaggggtcaccggac
